# Supplementary material for: Corynebacterium oculi-related bacterium may act as a pathogen and carrier of antimicrobial resistance genes in dogs: a case report
Source: PubMed Central journal article supplement (PMC10763336; doi:10.1186/s12917-023-03821-y), 2023-11-29
Supplement: 12917_2023_3821_MOESM1_ESM.pdf [file 12917_2023_3821_MOESM1_ESM.pdf]

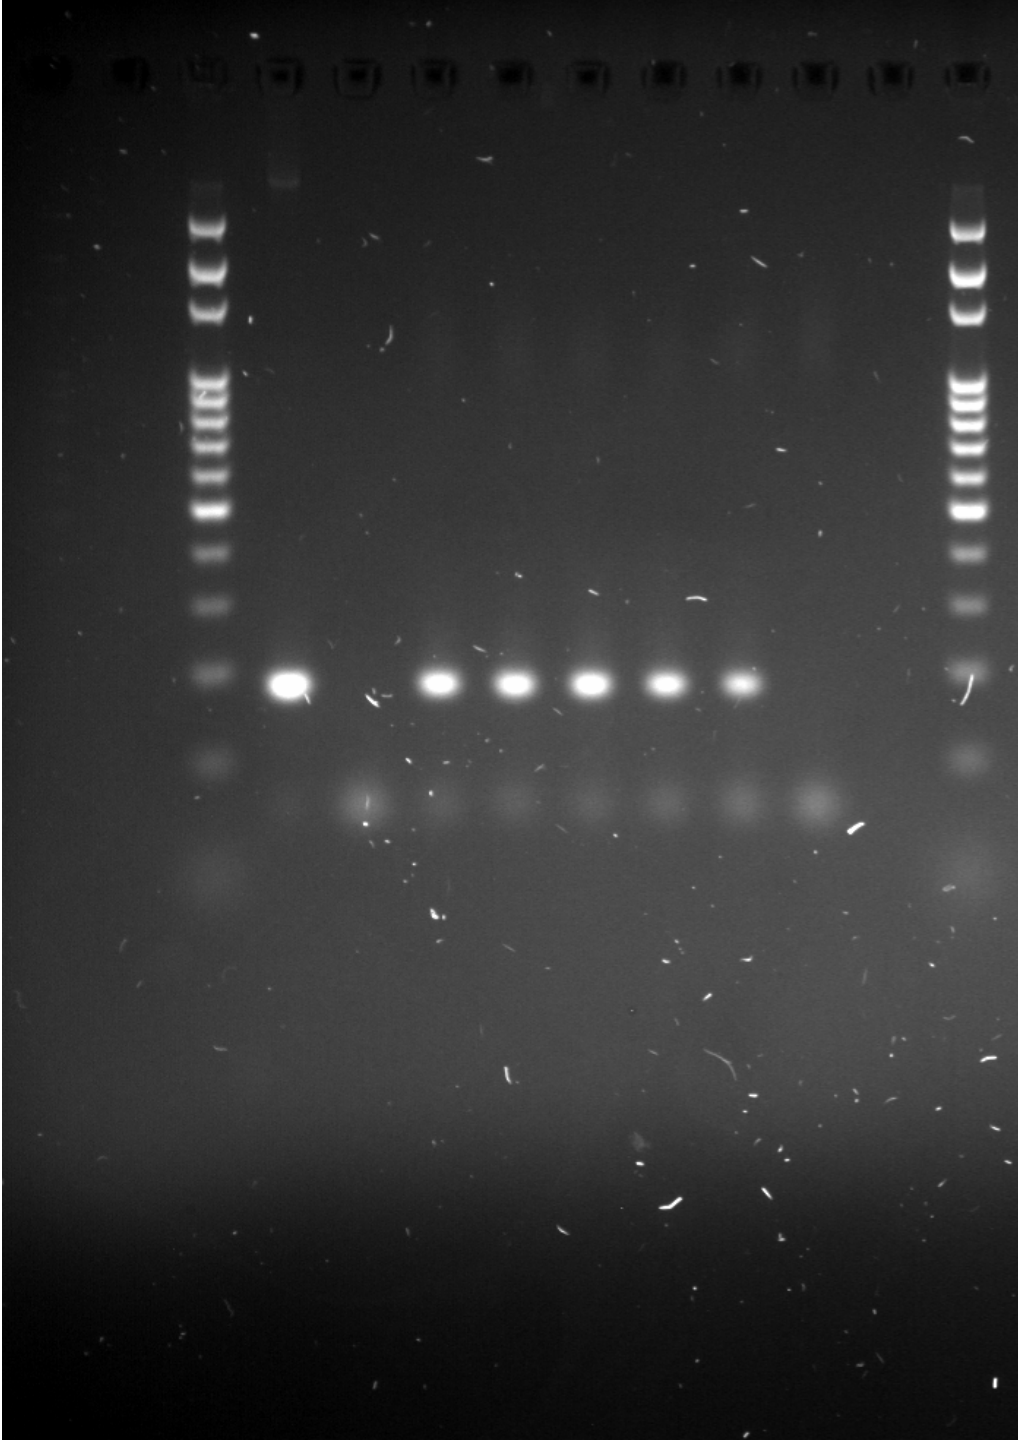

Additional file 1 Showing the uncropped gel used for figure 5.
